# Supplementary material for: What Is the Best Treatment Choice for Concomitant Ipsilateral Femoral Neck and Intertrochanteric Fracture? A Retrospective Comparative Analysis of 115 Consecutive Patients
Source: MDPI journal article supplement (doi:10.3390/jpm12111908), 2022-11-16
Supplement: s1 [file s1]

## Supplementary Table S1

**Table S1.** Summary of literatures regarding concomitant ipsilateral femoral neck and intertrochanter fracture.

| Author (year)             | Study design<br>& period  | Cases<br>(Incidence) | Age  | Sex<br>F:M | Mechanism | Fracture type | Diagnosis | Operation | F/U<br>(month) | Complication                           |
|---------------------------|---------------------------|----------------------|------|------------|-----------|---------------|-----------|-----------|----------------|----------------------------------------|
| An (1989) [4]             | Case/NS                   | 1                    | 97   | 0:1        | LE        | Type II       | Intraop   | HR        | NS             | None                                   |
| Pemberton (1989)<br>[17]  | Case/NS                   | 1                    | 73   | 1:0        | LE        | Type II       | Xry       | DHS       | 30             | None                                   |
| Isaacs (1993) [9]         | Case/NS                   | 1                    | 72   | 1:0        | LE        | Type I        | CT        | Screw     | NA             | Death*                                 |
| Taylor (1996) [25]        | Case/NS                   | 1                    | 89   | 1:0        | LE        | Type I        | Xry       | DHS       | 1              | Death*                                 |
| Taylor (1996) [25]        | Case/NS                   | 1                    | 74   | 0:1        | LE        | Type II       | Xry       | DHS       | 108            | Nonunion                               |
| Cohen (1999) [7]          | Case/NS                   | 1                    | 79   | 1:0        | LE        | Type II       | Intraop   | DHS       | 24             | None                                   |
| Kumar (2001) [12]         | Case/NS                   | 1                    | 83   | 1:0        | LE        | Type II       | Xry       | DHS       | 12             | ONFH                                   |
| Kyle (2005) [13]          | Retrospective<br>/10 year | 20 (8%)              | 63.6 | 7:13       | 16LE:4HE  | Type II       | Xry       | DHS       | 17             | 3 nonunion, 5<br>mechanical, 1<br>ONFH |
| Lakshmanan (2005)<br>[14] | Case/NS                   | 1                    | 91   | 1:0        | LE        | Type III      | Xry       | HR        | 6              | None                                   |
| Sayegh (2005) [21]        | Case/NS                   | 1                    | 54   | 0:1        | HE        | Type II       | Xry       | DHS       | 58             | LLD                                    |

|                              |                             |           |       |      |    |         |            |                         |      |                            |
|------------------------------|-----------------------------|-----------|-------|------|----|---------|------------|-------------------------|------|----------------------------|
| <b>Butt (2007) [6]</b>       | Case/NS                     | 1         | 30    | 0:1  | HE | Type II | Xry        | DCS                     | 12   | None                       |
| <b>Poulter (2007) [19]</b>   | Case/NS                     | 1         | 76    | 1:0  | LE | Type I  | Xry        | Plate                   | 4    | None                       |
| <b>Dhar (2008) [8]</b>       | Case/2006                   | 1         | 30    | 0:1  | HE | Type II | Xry        | Plate                   | 12   | None                       |
| <b>Perry (2008) [18]</b>     | Case/NS                     | 1         | 86    | 1:0  | LE | Type I  | Postop Xry | DHS                     | 12   | ONFH                       |
| <b>Loupasis (2010) [15]</b>  | Case/NS                     | 1         | 36    | 0:1  | HE | Type II | X-ray      | DHS                     | 24   | None                       |
| <b>Neogi (2011) [16]</b>     | Case/NS                     | 1         | 28    | 0:1  | HE | Type II | CT         | DCS                     | 28   | None                       |
| <b>Taniguchi (2013) [24]</b> | Case/NS                     | 1         | 76    | 0:1  | LE | Type II | CT         | HR                      | 6    | None                       |
| <b>Tahir (2014) [23]</b>     | Case/NS                     | 1         | 87    | 1:0  | LE | Type II | CT         | HR                      | 17   | None                       |
| <b>Khan (2017) [10]</b>      | Case/NS                     | 1         | 66    | 0:1  | LE | Type II | Xry        | HR                      | 18   | None                       |
| <b>Saleeb (2017) [20]</b>    | Case/NS                     | 1         | 88    | 1:0  | LE | Type I  | CT         | HR                      | NS   | Dislocation                |
| <b>Yoo (2017) [29]</b>       | Retrospective<br>/2001-2014 | 33 (9%)   | 76.25 | 29:4 | LE | Type II | CT         | CMN                     | 21.8 | 4 mechanical<br>1 nonunion |
| <b>Videla (2017) [27]</b>    | Retrospective<br>/2010-2016 | 31 (1.3%) | 81.5  | 24:9 | LE | Type II | CT         | HR4<br>DHS 13<br>CMN 12 | NS   | None                       |
| <b>Kothari (2019) [11]</b>   | Case/NS                     | 1         | 72    | 1:0  | LE | Type II | CT         | HR                      | 3    | None                       |
| <b>Ahmed (2020) [3]</b>      | Case/NS                     | 1         | 26    | 1:0  | HE | Type II | CT         | Plate                   | 60   | None                       |
| <b>Su (2020) [22]</b>        | Case/NS                     | 1         | 38    | 1:0  | HE | Type II | CT         | Plate                   | 84   | ONFH                       |

|                            |                             |    |      |      |          |         |    |                                              |    |                             |
|----------------------------|-----------------------------|----|------|------|----------|---------|----|----------------------------------------------|----|-----------------------------|
| <b>Su (2020) [22]</b>      | Case/NS                     | 1  | 29   | 0:1  | HE       | Type II | CT | Plate                                        | 36 | None                        |
| <b>Biesmans (2021) [5]</b> | Case/NS                     | 1  | 42   | 0:1  | HE       | Type II | CT | HR                                           | 12 | None                        |
| <b>Tong (2021) [26]</b>    | Retrospective<br>/2012-2018 | 19 | 61.3 | 9:10 | 8LE:11HE | Type II | CT | Screw 1<br>CMN 8<br>DHS 4<br>Plate 5<br>HR 1 | 13 | 1 nonunion, 2<br>mechanical |
| <b>Vluggen (2021) [28]</b> | Case/NS                     | 1  | 82   | 1:0  | LE       | Type II | CT | HR                                           | 11 | none                        |

The literatures are listed in chronological order, and any cases from studies, in which the total number of cases are below 10, are listed individually on separate rows.

\*Death: death by unrelated cause; HE: high energy; LE: low energy; STC: subtrochanteric fracture; ITC: intertrochanteric fracture; SC: subcapital femoral neck; TC: transcipital femoral neck; Xry: X-ray; CT: computed tomography; CMN: cephalomedullary nai; HR: hip replacement; DCS: dynamic condylar screw; DHS: dynamic hip screw; NS: not specified; ONFH: osteonecrosis of the femoral head; LLD: limb length discrepancy
